# Supplementary material for: Dose-Intense Cisplatin-Based Neoadjuvant Chemotherapy Increases Survival in Advanced Cervical Cancer: An Up-to-Date Meta-Analysis
Source: MDPI journal article supplement (doi:10.3390/cancers14030842), 2022-02-08
Supplement: s1 [file s1]

## Supplementary Table

Supplementary Table S1: Eligibility using the PICOS criteria

| Criteria                                                    | Inclusion                                                                                                                 | Exclusion                                                                                                        |
|-------------------------------------------------------------|---------------------------------------------------------------------------------------------------------------------------|------------------------------------------------------------------------------------------------------------------|
| Population                                                  | Women aged $\geq 18$ years with cervical cancer<br><br>FIGO stages IB2-IVA                                                | FIGO stages IA to IB1<br><br>FIGO IVB                                                                            |
| Intervention                                                | Cisplatin-based neoadjuvant chemotherapy<br><br>Local treatment using chemoradiation therapy, or radiotherapy, or surgery | Absence of experimental arm using neoadjuvant chemotherapy                                                       |
| Outcomes                                                    | Overall survival<br><br>Progression-free survival                                                                         | Other outcomes                                                                                                   |
| Study design                                                | Randomized clinical trials with full-texts published results of cisplatin-based neoadjuvant chemotherapy                  | Retrospective studies<br>Non-randomized trials<br>Meta-analysis<br>Case reports<br>Reviews<br>Conference reports |
| FIGO, International Federation of Gynecology and Obstetrics |                                                                                                                           |                                                                                                                  |

Supplementary table S2: Articles excluded at full-text screening stage

| Articles exclusion                                                                                                                                                                                                                                                                                           | Exclusion                            |
|--------------------------------------------------------------------------------------------------------------------------------------------------------------------------------------------------------------------------------------------------------------------------------------------------------------|--------------------------------------|
| Gong L, Zhang J-W, Yin R-T, et al: Safety and Efficacy of Neoadjuvant Chemotherapy Followed by Radical Surgery Versus Radical Surgery Alone in Locally Advanced Cervical Cancer Patients. <i>Int J Gynecol Cancer Off J Int Gynecol Cancer Soc</i> 26:722–728, 2016                                          | Retrospective study                  |
| Gupta S, Maheshwari A, Parab P, et al: Neoadjuvant Chemotherapy Followed by Radical Surgery Versus Concomitant Chemotherapy and Radiotherapy in Patients With Stage IB2, IIA, or IIB Squamous Cervical Cancer: A Randomized Controlled Trial. <i>J Clin Oncol Off J Am Soc Clin Oncol</i> 36:1548–1555, 2018 | Not cisplatin-based regimen          |
| Marana HRC, de Andrade JM, Dos Reis FJC, et al: Impact of surgical staging in locally advanced cervical cancer and subsequent chemotherapy. <i>J Surg Oncol</i> 100:505–510, 2009                                                                                                                            | Not compared NACT vs local treatment |
| Ohara K, Tsunoda H, Tanaka YO, et al: Explanation for the failure of neoadjuvant chemotherapy to improve outcomes after radiotherapy for locally advanced uterine cervical cancer from the standpoint of the tumor regression rate. <i>Radiat Med</i> 25:53–59, 2007                                         | Not randomized trial                 |
| Duenas-Gonzalez A, Lopez-Graniel C, Gonzalez-Enciso A, et al: Concomitant chemoradiation versus neoadjuvant chemotherapy in locally advanced cervical carcinoma: results from two consecutive phase II studies. <i>Ann Oncol Off J Eur Soc Med Oncol</i> 13:1212–1219, 2002                                  | Not randomized trial                 |
| Benedetti-Panici P, Greggi S, Scambia G, et al: Long-term survival following neoadjuvant chemotherapy and radical surgery in locally advanced cervical cancer. <i>Eur J Cancer Oxf Engl</i> 1990 34:341–346, 1998                                                                                            | Not randomized trial                 |
| Kumar L, Kaushal R, Nandy M, et al: Chemotherapy followed by radiotherapy versus radiotherapy alone in locally advanced cervical cancer: a randomized study. <i>Gynecol Oncol</i> 54:307–315, 1994                                                                                                           | Duplicate trial                      |

---

Yuan M, Wang Y, Kou L, et al: Neoadjuvant Chemotherapy Followed by Radical Surgery Versus Concurrent Chemoradiotherapy in Patients With Stage IIA-IIIA Cervical Carcinoma. Int J Radiat Oncol Biol Phys 108:e465–e466, 2020 Retrospective study

---
